# Supplementary material for: Deep Interactive Learning-based ovarian cancer segmentation of H&E-stained whole slide images to study morphological patterns of BRCA mutation
Source: PubMed Central journal article supplement — J Pathol Inform. 2022 Nov 26;14:100160. doi: 10.1016/j.jpi.2022.100160 (PMC9758515; doi:10.1016/j.jpi.2022.100160), 2022-11-26
Supplement: mmc1.pdf [file mmc1.pdf]

## Supplementary Information

Supplementary Figure 1

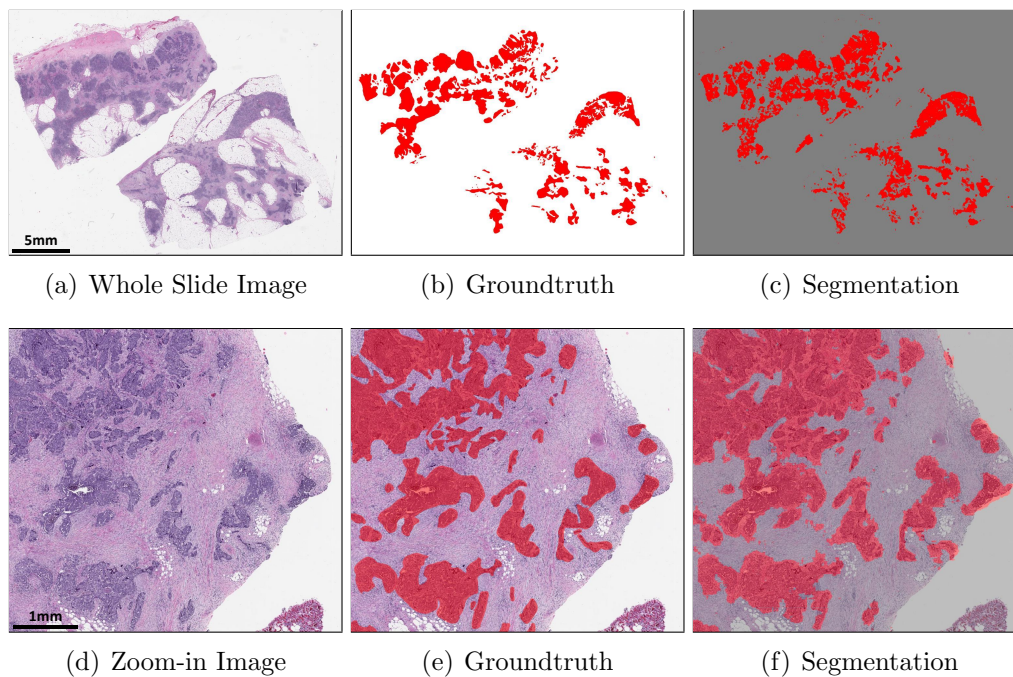

Supplementary Figure 1: Ovarian image, its groundtruth, and its segmentation. (a-c) show the entire whole slide image and (d-f) show a zoom-in image. Cancers are highlighted in red. White regions in (b,e) and gray regions in (c,f) are non-cancer.

Supplementary Figure 2

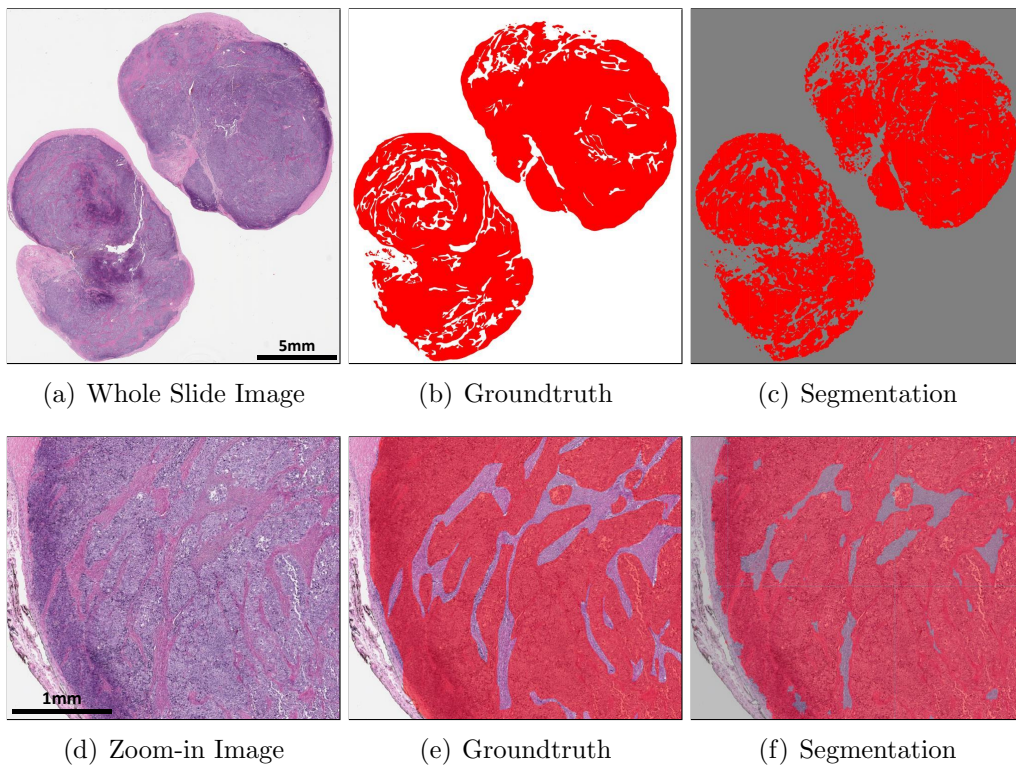

Supplementary Figure 2: Ovarian image, its groundtruth, and its segmentation. (a-c) show the entire whole slide image and (d-f) show a zoom-in image. Cancers are highlighted in red. White regions in (b,e) and gray regions in (c,f) are non-cancer.

Supplementary Figure 3

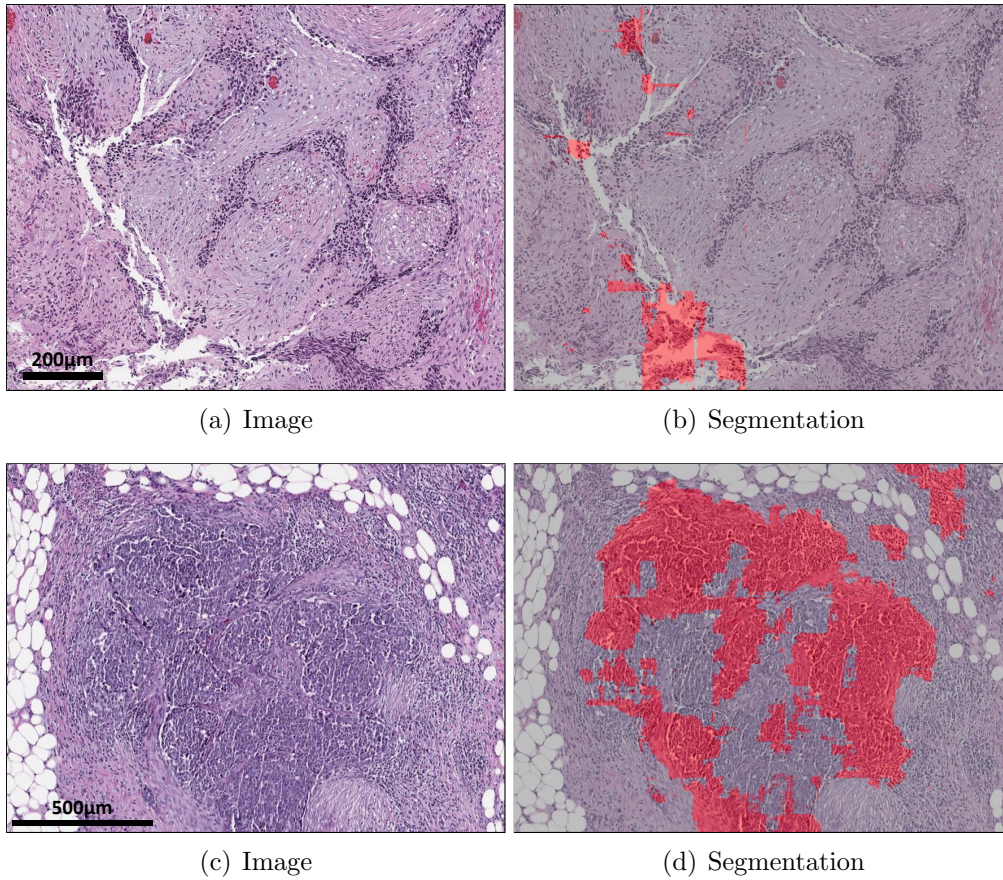

Supplementary Figure 3: False negatives of our cancer segmentation model. (a,b) Cautery artifact. (c,d) Poor staining. Red regions indicate cancer predicted by the segmentation model.



Supplementary Figure 4

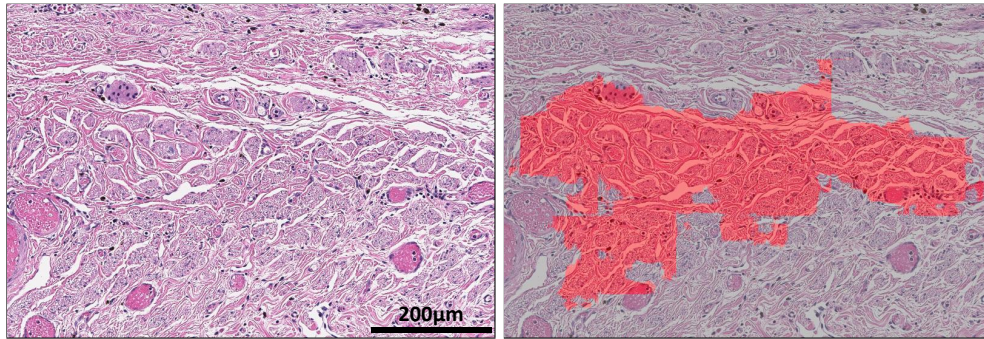

(a) Image

(b) Segmentation

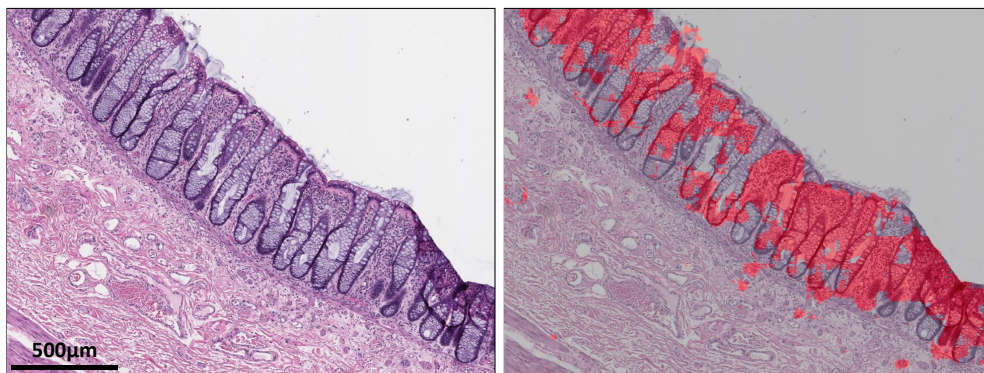

(c) Image

(d) Segmentation

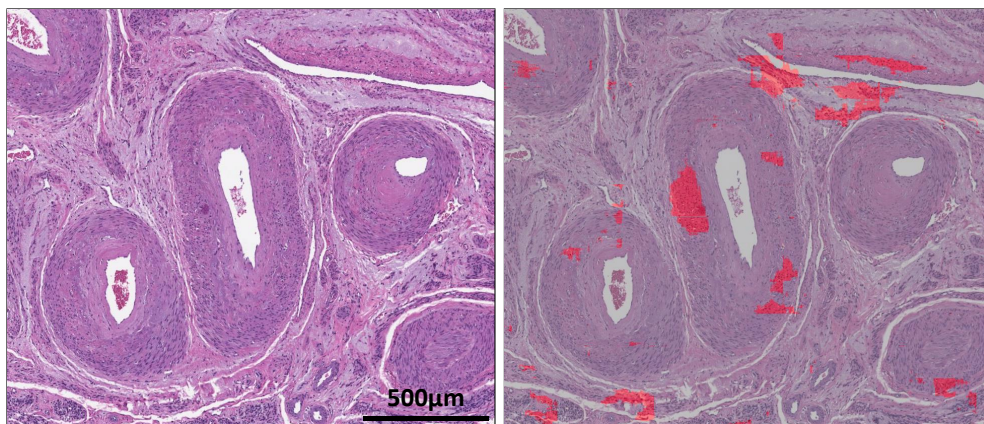

(e) Image

(f) Segmentation

Supplementary Figure 4: False positives of our cancer segmentation model. (a,b) Smooth muscle on fallopian tube. (c,d) Colon epithelium. (e,f) Blood vessels. Red regions indicate cancer predicted by the segmentation model.
